# Supplementary material
Source: PubMed Central journal article supplement (PMC3043167)
Supplement: NIHMS260730-supplement-1_si_001.pdf [file NIHMS260730-supplement-1_si_001.pdf]

# Supporting Information

## Engineering Encodable Lanthanide Binding Tags (LBTs) into Loop Regions of Proteins

*Katja Barthelmes<sup>†</sup>, Anne M. Reynolds<sup>‡</sup>, Ezra Peisach<sup>#</sup>, Hendrik R.A. Jonker<sup>†</sup>, Nicholas DeNunzio<sup>#</sup>,  
Karen N. Allen<sup>#\*</sup>, Barbara Imperiali<sup>‡\*</sup>, Harald Schwalbe<sup>†\*</sup>*

Contribution from the Institute for Organic Chemistry and Chemical Biology, Center for Biomolecular Magnetic Resonance, Johann Wolfgang Goethe-University of Frankfurt, Max-von-Laue-Strasse 7, 60438 Frankfurt, Germany, Departments of Chemistry and Biology, Massachusetts Institute of Technology, 77 Massachusetts Avenue, Cambridge, Massachusetts 02139 and Department of Chemistry, Boston University, 590 Commonwealth Avenue, Boston, Massachusetts 02215.

### **Primer sequence for cloning of IL1 $\beta$ -L2**

For\_IL1b(Bam,TEV): 5'-CGGGATCCGAGAATTTGTATTTTCAGG-3'

Rev\_IL1b(loop2): 5'-CCTTCAATCCAGCCATCGTTGTTGGTATCAATATAACCTTTCAACACG  
CAGGACAGGTAC-3'

For\_IL1b(loop2): 5'-CCAACAACGATGGCTGGATTGAAGGCGATGAACTGTATAAGCCCACT  
CTACAGCTGGAGAG-3'

Rev\_IL1b(Xho): 5'-CCGCTCGAGTTAGGAAGACACAAATTG-3'

### **Primer sequence for cloning of IL1 $\beta$ -L1 and IL1 $\beta$ -L3 via Site-Directed Mutagenesis of IL1 $\beta$ -L2**

#### **IL1 $\beta$ -L1**

IL1bL1\_D1: 5'-GTCCTGCGTGTTGaaagatGGTTATATTGATACCAAC-3'

IL1bL1\_D1-r: 5'-GTTGGTATCAATATAACCATCTTTCAACACGCAGGAC-3'

IL1bL1\_D2: 5'-GAAGGCGATGAACTGTATgataagCCCACTCTACAG-3'

IL1bL1\_D2-r: 5'-CTGTAGAGTGGGCTTATCATAACAGTTCATCGCCTTC-3'

#### **IL1 $\beta$ -L3**

IL1bL1\_K1: 5'-CTGTCCTGCGTGTTGGGTTATATTGATACCAACAAC-3'

IL1bL1\_K1-r: 5'-GTTGTTGGTATCAATATAACCCAACACGCAGGACAG-3'

IL1bL1\_K2: 5'-GAAGGCGATGAACTGTATCCCACTCTACAGCTGG-3'

IL1bL1\_K2-r: 5'-CCAGCTGTAGAGTGGGATAACAGTTCATCGCCTTC-3'

### **Primer sequence for cloning of IL1 $\beta$ -R2**

For\_IL1b(Bam,TEV): 5'-CGGGATCCGAGAATTTGTATTTTCAGG-3'

Rev\_IL1b(loop3): 5'-CCTTCAATCCAGCCATCGTTGTTGGTATCAATATAACCTTTGGTCCCT  
CCCAGGAAGAC-3'

For\_IL1b(loop3): 5'-CCAACAACGATGGCTGGATTGAAGGCGATGAACTGTATCAGGATATA  
ACTGACTTCACC -3'

Rev\_IL1b(Xho): 5'-CCGCTCGAGTTAGGAAGACACAAATTG-3'

### **Primer sequence for cloning of IL1 $\beta$ -R1 and IL1 $\beta$ -R3 via Site-Directed Mutagenesis of IL1 $\beta$ -R2**

#### **IL1 $\beta$ -R1**

For\_IL1b(Gly1): 5'-CTGGGAGGGACCAAAGGCGGTTATATTGATACC-3'

Rev\_IL1b(Gly1): 5'-GGTATCAATATAACCGCCTTTGGTCCCTCCCAG-3'

For\_IL1b(Gly2): 5'-GATGAACTGTATGGCCAGGATATAACTGACTTCAC-3'

Rev\_IL1b(Gly2): 5'-GTGAAGTCAGTTATATCCTGGCCATACAGTTCATC-3'

#### **IL1 $\beta$ -R3**

For\_IL1b(Lys): 5'-GTCTTCCTGGGAGGGACCGGTTATATTGATACC-3'

Rev\_IL1b(Lys): 5'-GGTATCAATATAACCGGTCCCTCCCAGGAAGAC-3'

For\_IL1b(Gln): 5'-GGCGATGAACTGTATGATATAACTGACTTCACC-3'

Rev\_IL1b(Gln): 5'-GGTGAAGTCAGTTATATCATAACAGTTCATCGCC-3'

**Primer sequence for site-directed mutagenesis of all IL1 $\beta$ -LBT proteins to remove Gly from TEV site**

For\_IL1b(Met): 5'-GAGAATTTGTATTTTCAGATGGCACCTGTACGATCGC-3'

Rev\_IL1b(Met): 5'-GCGATCGTACAGGTGCCATCTGAAAATACAAATTCTC-3'

**Primer sequence for cloning of IL1 $\beta$ -S1, -S2 and -S3**

For\_IL1b(Bam, TEV): 5'-CGGGATCCGAGAATTTGTATTTTCAGGGCATGGCACCTGTACGATCGCTGAAC-3'

Rev\_IL1b(Xho): 5'-CCGCTCGAGTTAGGAAGACACAAATTGCATGGT-3'

**Expression of GST-TEV-IL1 $\beta$ -LBT by Auto-induction**

Starting from an overnight culture in 2.5 mL minimal non-inducing media, BL21-CodonPlus(DE3)-RIL expressing the desired GST-fusion protein were grown in 500 mL complex auto-inducing media (ZYM-5052) and shaken for 24 h at 37 °C. The cells were harvested by centrifugation and the final pellets were stored at -80°C until needed.<sup>1</sup>

**Expression and purification of <sup>15</sup>N-GST-TEV-IL1 $\beta$ -LBT by Auto-induction.**

Starting from an overnight culture in 2.5 mL minimal non-inducing media, BL21-CodonPlus(DE3)-RIL expressing the desired GST-fusion protein were grown in 500 mL minimal autoinducing media (P-5052) and shaken for 24 h at 37 °C. The cells were harvested by centrifugation and the final pellets were stored at -80°C until needed.<sup>1</sup>

All purification was performed at 4 °C. The cell pellet from the 500 mL growth was thawed and resuspended in a lysis buffer (1 x PBS, 100 mM EDTA, 10% Glycerol, 1% Triton X-100, 5 mM  $\beta$ -mercaptoethanol ( $\beta$ -ME), 1 mg/mL Hen egg white lysozyme, 1000 x dilution of Protease Inhibitor Cocktail III (Calbiochem)) and incubated for 20 minutes. Cells were lysed by sonication, and cellular

debris was pelleted by centrifugation. Supernatant was incubated over night with Glutathione-sepharose resin (Amersham Biosciences), washed extensively with PBS, and the GST-construct was then eluted using a 10 mM glutathione solution in 50 mM Tris (pH 8.0) buffer containing the same protease inhibitor cocktail. Elution fractions were analyzed by 12% SDS-PAGE. Purified protein was stored at 4°C until cleavage by mTEV protease.

#### **Cleavage by mTEV protease and purification of GST-TEV-IL1 $\beta$ -LBT proteins.**

The cleavage reactions were conducted in 50 mM Tris, 150 mM NaCl, 0.5 mM EDTA and 10 mM  $\beta$ -ME using 20  $\mu$ L recombinant mTEV protease per mg protein. The reaction mixtures were incubated overnight at room temperature and analyzed on 12%-SDS-Page gels for completeness.

The cleaved proteins were purified using size exclusion chromatography. A HiLoad 16/60 Superdex-75 column was equilibrated with 10 mM HEPES, 100 mM NaCl, 5 mM  $\beta$ -ME at pH 7. The protein was loaded onto the column and after a 50-minute delay, 1 mL fractions were collected for 40 minutes at a flow rate of 1 mL/min. The absorbance at 280 nm was monitored and fractions corresponding to the two peaks were collected and analyzed on 12% SDS-Page gels (Figure S1).

| Construct | LBT between loop residues | Expression yields out of 500 mL <sup>15</sup> N-AI minimum culture |
|-----------|---------------------------|--------------------------------------------------------------------|
| IIIβ-S1   | 53-54                     | 5 mg                                                               |
| IIIβ-S2   | 52-55                     | 3 mg                                                               |
| IIIβ-S3   | 51-56                     | 4 mg                                                               |
| IIIβ-L1   | 75-76                     | 2 mg                                                               |
| IIIβ-L2   | 74-77                     | 3 mg                                                               |
| IIIβ-L3   | 73-78                     | 1 mg                                                               |
| IIIβ-R1   | 139-140                   | 2 mg                                                               |
| IIIβ-R2   | 138-141                   | 8 mg                                                               |
| IIIβ-R3   | 137-142                   | 3 mg                                                               |

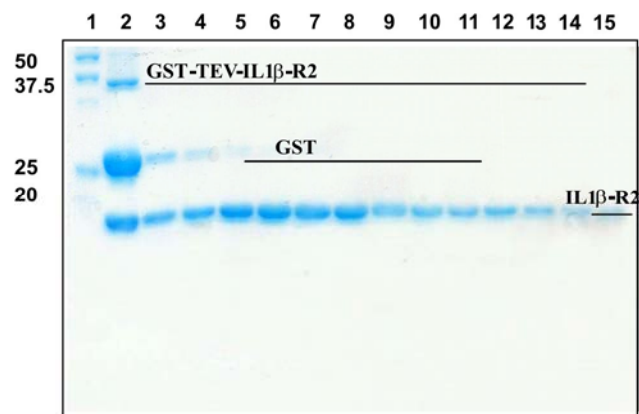

**Figure S1** Expression yields of IL1β- S, -L and -R series (left) and a representative 12 % SDS page gel of IL1β-R2 stained with Coomassie brilliant blue (right). Lane 1: protein mass ladder; lane 2: GST-TEV- IL1β-R2; lane 3 to 15: Fractions of purified IL1β-R2 by Size exclusion chromatography.

## **Expression of IL1 $\beta$ -S1 for crystallization**

For expression of the IL1 $\beta$ -S1 constructs, a single colony was transferred to 2mL of ZYP-0.8g media containing 50  $\mu$ g/ml of ampicillin and grown at 37 °C until turbid. The culture (200 $\mu$ l) was then transferred to 400 ml of ZYM5052 containing 50  $\mu$ g/ml of ampicillin and grown at 25 °C overnight until the OD600 reached a plateau (typically OD600 = 7-9). Cells were harvested by centrifugation at 8000 x g for 20 min, the pellet resuspended in 50ml 15 mM Tris pH 8.0, centrifuged at 4000 x g, and the supernatant removed and the pellet frozen overnight at -80 °C.

The frozen cell pellet was resuspended in 50 mL lysis buffer (50 mM Tris pH 8.0, 1 mM EDTA, 1 mM PMSF, 1 mM BME) and stirred on ice. A spatula tip of DNase I and lysozyme were added and stirring continued for 45 min. Cells were sonicated 3 x 30 seconds and the suspension centrifuged 145 x kg for thirty min. and the supernatant retained. Ammonium sulfate cuts of the supernatant were made and protein that precipitated between 40-75% ammonium sulfate was pooled and dialyzed against 1M NH<sub>4</sub>SO<sub>4</sub> in 50 mM Tris pH 7.5, 1mM BME (Buffer A), loaded on a HR 16/10 butyl sepharose column and eluted with a 15 column volume gradient from 1M to 0 M of NH<sub>4</sub>SO<sub>4</sub> in Buffer A. Fractions containing protein were pooled and precipitated in 75% ammonium sulfate to reduce volume. The precipitate was resuspended in 5 ml Buffer A and dialyzed against the same buffer. The sample was loaded on a 5 ml HiTrap Q HP 5ml column and eluted with a 20 column volume gradient from 0 M to 1 M sodium chloride in Buffer A. Fractions containing IL1 $\beta$ -S1 (approximately 95% pure) were pooled, dialyzed against 50mM Hepes pH 7.5, 150mM NaCl, concentrated in an Amicon concentrator to 0.5 ml and loaded on a HiPrep 26/60 Sephacryl S-200 column and eluted at 1.5ml/min with 50mM Hepes pH 7.5, 150 mM NaCl. Eluted protein was a single band on an SDS-PAGE. Protein fractions were pooled and dialyzed against 20 mM Hepes pH 7.3 and stored at 4 °C.

## Receptor-binding assay.

In a microspin column (Biorad) 50  $\mu$ L glutathione sepharose beads (GE Healthcare Biosciences, max binding capacity = 500  $\mu$ g) were loaded with 1.0 mg of the appropriate GST fusion protein and incubated with the resin with gentle agitation at 4°C for 2 hours. 125  $\mu$ L (200 $\mu$ g/mL) lyophilized s-IL-1R<sub>1</sub> (R&D Systems) was then added to the beads along with 375  $\mu$ L PBS+0.1% BSA, incubated overnight at 4°C (Figure S2).

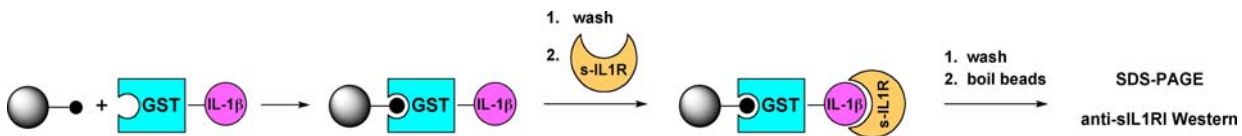

**Figure S2** GST pull-down assay for s-IL-1R<sub>1</sub> receptor binding.

After extensive washing, receptor capture by the GST-tagged IL1 $\beta$ -LBT was analyzed by SDS-PAGE and Western blot. Control experiments were performed to ensure that the receptor would bind to GST-tagged IL1 $\beta$  without an LBT. Two negative controls were also performed - one in which the beads were incubated only with PBS buffer prior to addition of the receptor, and one in which the beads were incubated with GST prior to receptor-binding. These experiments established that there was no nonspecific binding of the receptor to either beads or GST. The results for receptor-binding assays for the three loop series confirm that the receptor does bind to all of the constructs as analyzed by SDS-PAGE and an anti-s-IL-1R<sub>1</sub> Western blot (Figure S3)



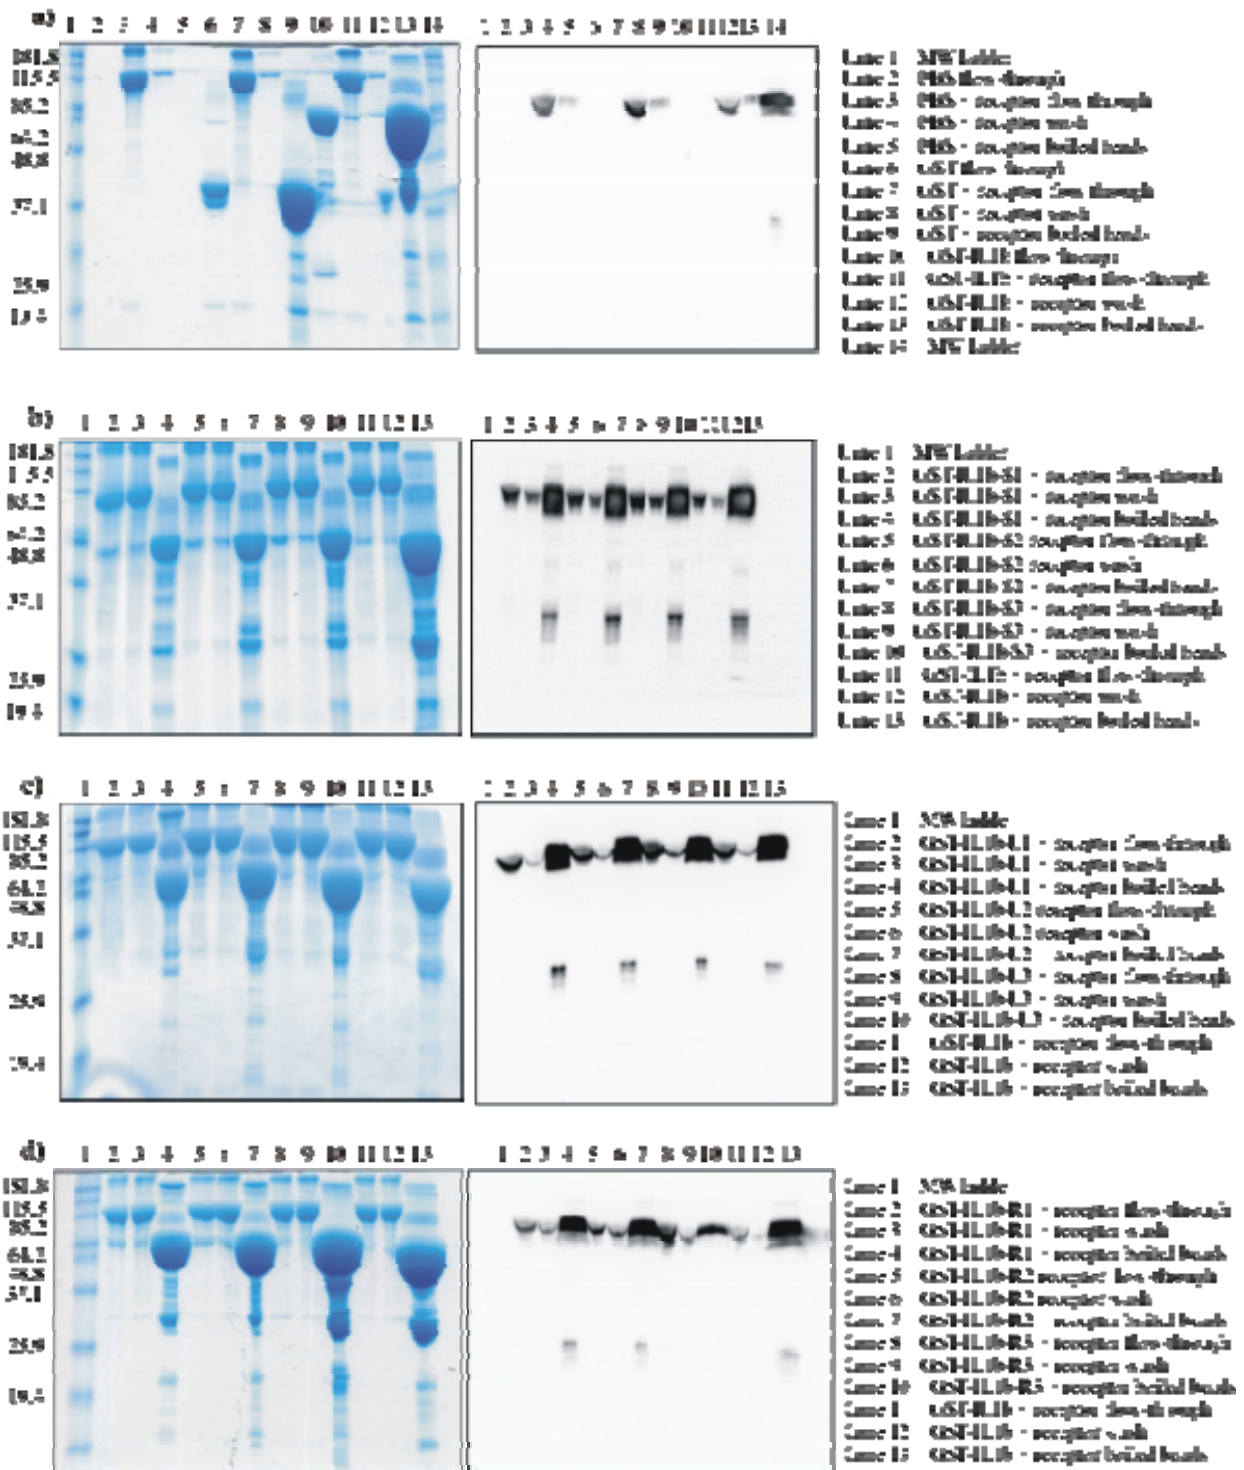

**Figure S3** Receptor-binding assay results, with 12% SDS-Page gels (left) and anti-s-IL-1R<sub>1</sub> Western blots (right). (a) Control binding studies. Nonspecific binding was not observed. Assay with (b) GST-IL1β-S1, -S2 and S3, (c) GST-IL1β-L1, -L2 and L3 and (d) GST-IL1β-R1, -R2 and -R3.

### Number of bound water molecules in the coordination sphere of terbium.

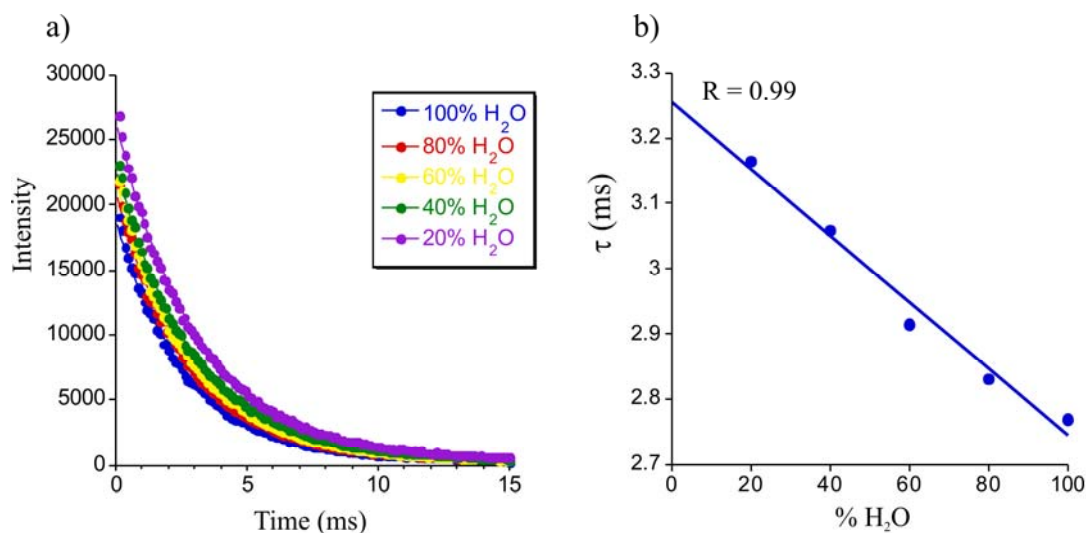

**Figure S4** (a) Luminescence decay measurements in varying concentrations of H<sub>2</sub>O and D<sub>2</sub>O. Representative data shown for IL1 $\beta$ -L1. (b) Values of  $\tau$  (determined from fits of data in (a)) plotted against the percentage of H<sub>2</sub>O, allowing extrapolation to 100% D<sub>2</sub>O.

**Table S1.**  $^1\text{H}$  and  $^{15}\text{N}$  Chemical Shift values for  $^{15}\text{N}$ -IL1 $\beta$ - R2 at pH 7 and 20 °C, 10 mM HEPES, 100 mM NaCl, 10  $\mu\text{M}$  DSS.

| Residue |     |     | $^1\text{H}$ [ppm] | $^{15}\text{N}$ [ppm] | Residue |     |     | $^1\text{H}$ [ppm] | $^{15}\text{N}$ [ppm] |
|---------|-----|-----|--------------------|-----------------------|---------|-----|-----|--------------------|-----------------------|
| A       | Ala | 1   |                    |                       | S       | Ser | 43  | 9,23               | 115,64                |
| P       | Pro | 2   |                    |                       | M       | Met | 44  | 9,69               | 132,12                |
| V       | Val | 3   | 8,15               | 119,44                | S       | Ser | 45  | 8,95               | 121,24                |
| R       | Arg | 4   | 9,02               | 128,30                | F       | Phe | 46  | 8,53               | 123,53                |
| S       | Ser | 5   | 8,42               | 118,91                | V       | Val | 47  | 7,42               | 118,23                |
| L       | Leu | 6   | 9,14               | 122,76                | Q       | Gln | 48  | 8,61               | 120,22                |
| N       | Asn | 7   | 8,89               | 121,00                | G       | Gly | 49  | 8,44               | 112,29                |
| C       | Cys | 8   | 9,68               | 118,10                | E       | Glu | 50  | 8,58               | 121,76                |
| T       | Thr | 9   | 8,99               | 109,67                | E       | Glu | 51  | 8,62               | 123,15                |
| L       | Leu | 10  | 9,50               | 120,83                | S       | Ser | 52  | 8,49               | 117,28                |
| R       | Arg | 11  | 8,68               | 119,78                | a)      | N   | Asn | 53                 |                       |
| D       | Asp | 12  | 8,51               | 120,43                | D       | Asp | 54  | 8,57               | 116,06                |
| S       | Ser | 13  | 7,55               | 114,85                | K       | Lys | 55  | 7,63               | 119,03                |
| Q       | Gln | 14  | 8,09               | 120,77                | a)      | I   | Ile | 56                 |                       |
| Q       | Gln | 15  | 8,48               | 111,25                | P       | Pro | 57  |                    |                       |
| a)      | K   | Lys | 16                 |                       | V       | Val | 58  | 10,10              | 118,10                |
| a)      | S   | Ser | 17                 |                       | A       | Ala | 59  | 8,73               | 120,83                |
| L       | Leu | 18  | 8,90               | 122,40                | L       | Leu | 60  | 10,61              | 124,40                |
| V       | Val | 19  | 8,85               | 115,55                | G       | Gly | 61  | 8,33               | 110,19                |
| M       | Met | 20  | 8,77               | 120,71                | L       | Leu | 62  | 8,29               | 121,76                |
| S       | Ser | 21  | 8,71               | 120,21                | K       | Lys | 63  |                    |                       |
| G       | Gly | 22  | 8,20               | 112,08                | E       | Glu | 64  | 9,01               | 118,98                |
| P       | Pro | 23  |                    |                       | K       | Lys | 65  | 7,62               | 115,40                |
| Y       | Tyr | 24  | 8,11               | 110,63                | a)      | N   | Asn | 66                 |                       |
| E       | Glu | 25  | 7,24               | 119,80                | L       | Leu | 67  | 6,89               | 115,79                |
| L       | Leu | 26  | 8,70               | 123,13                | Y       | Tyr | 68  | 9,23               | 121,61                |
| K       | Lys | 27  | 9,25               | 119,52                | L       | Leu | 69  | 8,54               | 122,02                |
| A       | Ala | 28  | 7,67               | 119,02                | S       | Ser | 70  | 9,22               | 116,09                |
| L       | Leu | 29  | 9,49               | 126,03                | C       | Cys | 71  | 8,48               | 119,76                |
| H       | His | 30  | 10,22              | 122,28                | V       | Val | 72  | 8,88               | 117,36                |
| L       | Leu | 31  | 8,50               | 126,39                | L       | Leu | 73  | 8,63               | 123,92                |
| Q       | Gln | 32  | 9,00               | 120,32                | K       | Lys | 74  | 8,28               | 126,51                |
| G       | Gly | 33  | 8,85               | 109,82                | D       | Asp | 75  | 9,37               | 128,30                |
| Q       | Gln | 34  | 8,98               | 122,24                | D       | Asp | 76  | 8,57               | 109,84                |
| D       | Asp | 35  | 8,00               | 119,18                | K       | Lys | 77  | 7,76               | 120,40                |
| M       | Met | 36  | 7,69               | 118,44                | P       | Pro | 78  |                    |                       |
| E       | Glu | 37  | 8,16               | 117,67                | T       | Thr | 79  | 8,84               | 120,09                |
| Q       | Gln | 38  | 8,00               | 117,24                | L       | Leu | 80  | 8,97               | 127,17                |
| Q       | Gln | 39  | 7,57               | 117,32                | Q       | Gln | 81  | 9,78               | 126,66                |
| V       | Val | 40  | 8,40               | 123,06                | L       | Leu | 82  | 8,57               | 122,45                |
| V       | Val | 41  | 7,80               | 123,97                | E       | Glu | 83  | 9,23               | 124,07                |
| F       | Phe | 42  | 9,68               | 127,64                | S       | Ser | 84  | 8,83               | 121,73                |

**Table S1.** (continued)

|    | Residue | <sup>1</sup> H [ppm] | <sup>15</sup> N [ppm] | Residue      | <sup>1</sup> H [ppm] | <sup>15</sup> N [ppm] |
|----|---------|----------------------|-----------------------|--------------|----------------------|-----------------------|
| a) | V Val   | 85                   |                       | A Ala        | 127                  | 8,24 121,18           |
|    | D Asp   | 86                   | 8,21 122,14           | E Glu        | 128                  | 8,57 117,44           |
|    | P Pro   | 87                   |                       | N Asn        | 129                  | 8,13 114,04           |
|    | K Lys   | 88                   | 8,48 117,31           | M Met        | 130                  | 8,98 118,16           |
|    | N Asn   | 89                   | 7,80 114,86           | P Pro        | 131                  |                       |
|    | Y Tyr   | 90                   | 7,29 116,49           | V Val        | 132                  | 8,08 125,86           |
|    | P Pro   | 91                   |                       | F Phe        | 133                  | 8,81 125,25           |
|    | K Lys   | 92                   | 7,27 116,54           | L Leu        | 134                  | 9,03 122,55           |
|    | K Lys   | 93                   | 8,37 119,69           | G Gly        | 135                  | 9,40 115,44           |
|    | K Lys   | 94                   | 7,93 118,23           | G Gly        | 136                  | 8,77 110,73           |
|    | M Met   | 95                   | 7,69 122,70           | T Thr        | 137                  | 7,76 114,06           |
|    | E Glu   | 96                   | 9,23 122,87           | K Lys        | 138                  | 8,33 124,14           |
|    | K Lys   | 97                   | 8,29 121,91           | G <b>Gly</b> | 139                  | 8,09 109,69           |
|    | R Arg   | 98                   | 7,99 114,41           | Y <b>Tyr</b> | 140                  | 8,07 118,91           |
|    | F Phe   | 99                   | 7,92 116,70           | I <b>Ile</b> | 141                  | 9,00 123,15           |
|    | V Val   | 100                  | 7,50 117,99           | D <b>Asp</b> | 142                  | 8,73 124,71           |
|    | F Phe   | 101                  | 9,90 127,36           | T <b>Thr</b> | 143                  | 8,14 120,92           |
|    | N Asn   | 102                  | 10,47 121,32          | N <b>Asn</b> | 144                  | 8,45 115,75           |
|    | K Lys   | 103                  | 9,41 127,84           | N <b>Asn</b> | 145                  | 8,14 115,51           |
|    | I Ile   | 104                  | 9,35 134,28           | D <b>Asp</b> | 146                  | 8,09 115,38           |
|    | E Glu   | 105                  | 8,56 127,48           | G <b>Gly</b> | 147                  | 9,77 111,24           |
|    | I Ile   | 106                  | 8,62 125,96           | W <b>Trp</b> | 148                  | 7,98 120,03           |
|    | N Asn   | 107                  | 9,42 126,43           | I <b>Ile</b> | 149                  | 9,27 131,40           |
|    | N Asn   | 108                  | 8,92 110,35           | E <b>Glu</b> | 150                  | 8,85 109,12           |
|    | K Lys   | 109                  | 8,05 120,49           | G <b>Gly</b> | 151                  | 9,29 127,24           |
|    | L Leu   | 110                  | 9,40 122,31           | D <b>Asp</b> | 152                  | 8,32 118,35           |
|    | E Glu   | 111                  | 8,74 118,58           | E <b>Glu</b> | 153                  | 8,65 127,27           |
|    | F Phe   | 112                  | 10,46 119,72          | L <b>Leu</b> | 154                  | 7,20 115,57           |
|    | E Glu   | 113                  | 8,82 126,28           | Y <b>Tyr</b> | 155                  | 7,34 119,58           |
|    | S Ser   | 114                  | 9,24 122,11           | Q Gln        | 156                  | 8,51 122,97           |
|    | A Ala   | 115                  | 8,18 128,62           | D Asp        | 157                  | 7,91 122,09           |
|    | Q Gln   | 116                  | 8,00 117,24           | I Ile        | 158                  | 8,34 122,31           |
|    | F Phe   | 117                  | 7,44 117,17           | a) T Thr     | 159                  |                       |
|    | P Pro   | 118                  |                       | a) D Asp     | 160                  |                       |
|    | N Asn   | 119                  | 10,40 114,33          | F Phe        | 161                  | 9,44 117,54           |
|    | W Trp   | 120                  | 8,19 120,46           | T Thr        | 162                  | 9,64 110,00           |
|    | Y Tyr   | 121                  | 9,49 119,73           | M Met        | 163                  | 8,78 121,57           |
| a) | I Ile   | 122                  |                       | Q Gln        | 164                  | 8,49 123,96           |
| a) | S Ser   | 123                  |                       | F Phe        | 164                  | 8,85 123,75           |
|    | T Thr   | 124                  | 9,11 110,25           | V Val        | 166                  | 8,12 123,34           |
|    | S Ser   | 125                  | 9,62 114,01           | S Ser        | 167                  | 8,52 119,94           |
|    | Q Gln   | 126                  | 8,88 122,26           | S Ser        | 168                  | 8,12 122,98           |

a) The amino acid backbone resonances of these amino acids could not be assigned in the <sup>1</sup>H-<sup>15</sup>N-HSQC spectra.

## Comparison of IL1 $\beta$ -R2 with wt-IL1 $\beta$

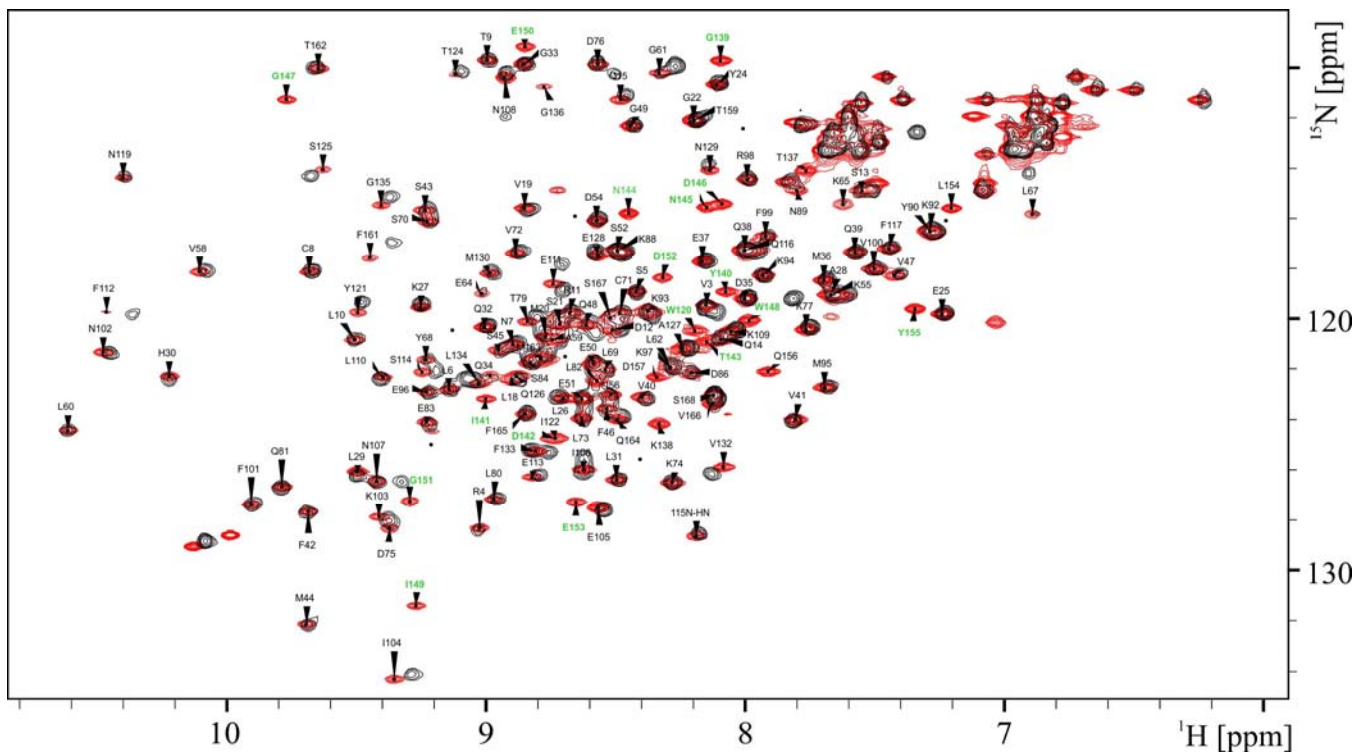

**Figure S5.** Overlay of the 2D-<sup>1</sup>H-<sup>15</sup>N HSQC spectra of IL1 $\beta$ -R2 (red) and wt-IL1 $\beta$  (black) at pH 7 and 20 °C, 10 mM HEPES, 100 mM NaCl, 10  $\mu$ M DSS. Peaks originated from the LBT are shown in green.

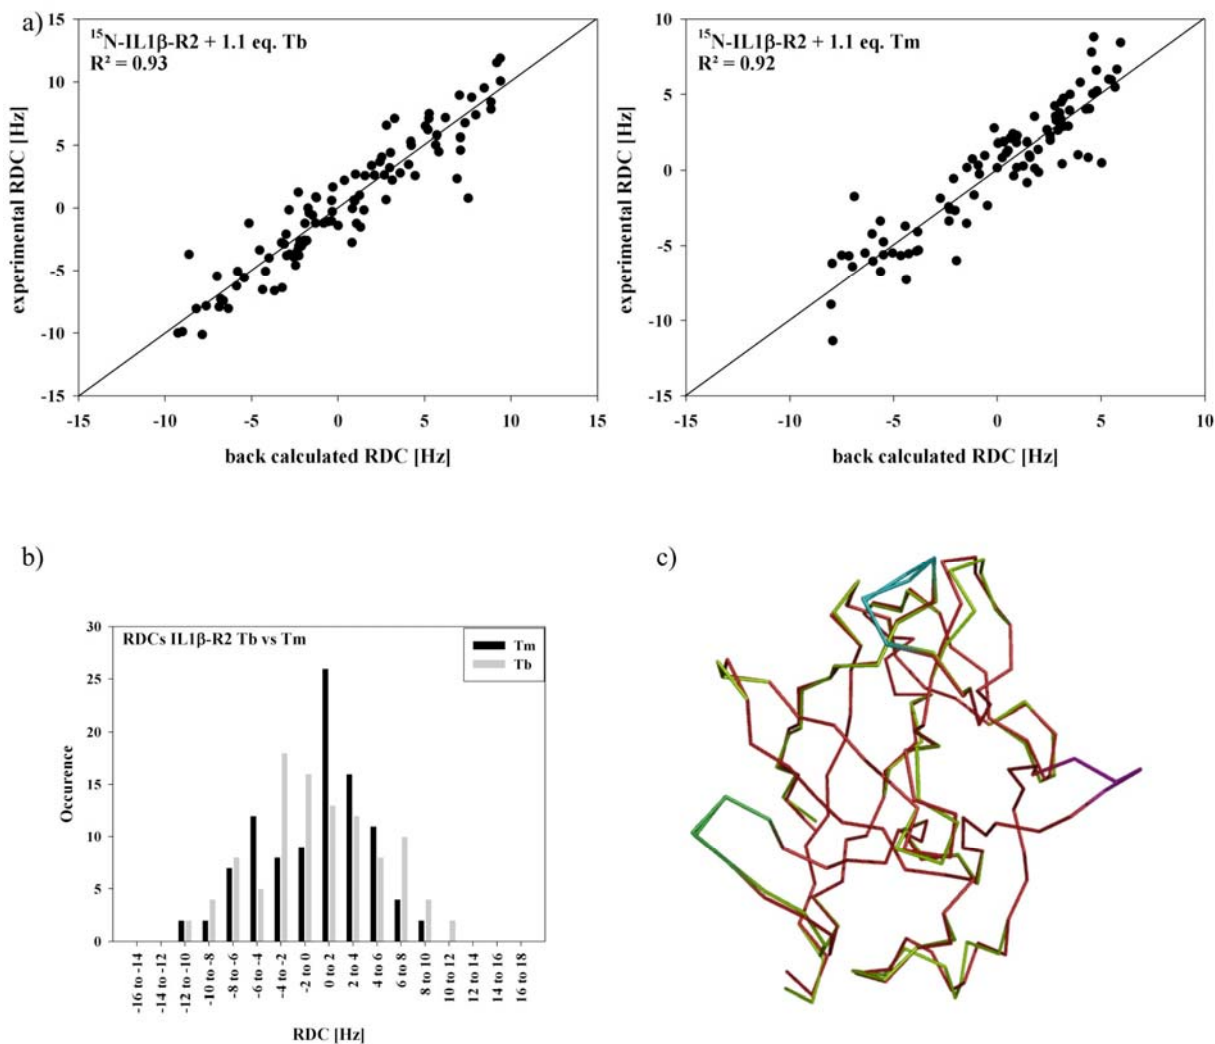

**Figure S6.** (a) Scatter plot showing the correlation between observed  $^1\text{D}_{\text{HN}}$  dipolar shifts [Hz] and those back-calculated with the program PALES<sup>2</sup> based on the crystal structure of IL1 $\beta$  (PDB entry 9ILB) for  $^{15}\text{N-IL1}\beta\text{-R2}$  using  $\text{Tb}^{3+}$  or  $\text{Tm}^{3+}$  as paramagnetic lanthanide ion. The correlation coefficient is 0.93 or  $\text{Tb}^{3+}$  and 0.92 for  $\text{Tm}^{3+}$ . The protein concentration was 0.5 mM. NMR buffer composition was 10 mM HEPES (pH 7), 100 mM NaCl at 36 °C. (b) RDC histogram for  $^{15}\text{N-IL1}\beta\text{-R2}$  loaded with  $\text{Tb}^{3+}$  compared with that for  $^{15}\text{N-IL1}\beta\text{-R2}$  loaded with  $\text{Tm}^{3+}$ . (c) Overlay of the refined model of IL1 $\beta$ -R2 (green) with the reference crystal structure 9ILB (red). The RMSD of both structures is 0.398 Å. The modelling was performed using the crystal structure of IL1 $\beta$  (PDB entry 9ILB) and the previously optimized  $\Delta\chi$ -tensor parameters.

**Table S2.** PCSs of backbone  $^1\text{H}$  and  $^{15}\text{N}$  of IL1 $\beta$ -R2.

| R2  | PCS [ppm] |          | PCS [ppm] |          | PCS [ppm] |          | PCS [ppm] |          |        |        |   |       |        |
|-----|-----------|----------|-----------|----------|-----------|----------|-----------|----------|--------|--------|---|-------|--------|
|     | Tb (III)  | Tm (III) |        |        |   |       |        |
| A1  |           |          |           |          | K55       | HN       | -0.294    | N        | -0.256 |        |   |       |        |
| P2  |           |          |           |          | I56       | HN       | 0.320     | N        | 0.317  |        |   |       |        |
| V3  | HN        | 0.088    | -0.059    | N        | 0.126     | -0.129   | P57       |          |        |        |   |       |        |
| R4  | HN        | 0.102    | -0.079    | N        | 0.107     | -0.114   | V58       | HN       | 0.267  | -0.211 | N | 0.196 | -0.210 |
| S5  | HN        | 0.104    | -0.059    | N        | 0.170     | -0.105   | A59       | HN       | 0.194  | -0.134 | N | 0.199 | -0.168 |
| L6  | HN        | 0.121    | -0.081    | N        | 0.098     | -0.063   | L60       | HN       | 0.200  | -0.146 | N | 0.174 | -0.110 |
| N7  | HN        |          | -0.050    | N        |           | -0.053   | G61       | HN       | 0.136  | -0.093 | N | 0.166 | -0.099 |
| C8  | HN        | 0.081    | -0.061    | N        | 0.125     | -0.047   | L62       | HN       | 0.104  | -0.065 | N | 0.105 | 0.006  |
| T9  | HN        | 0.064    | -0.038    | N        | 0.083     | -0.034   | K63       |          |        |        |   |       |        |
| L10 | HN        | 0.071    | -0.054    | N        | 0.152     | -0.054   | E64       | HN       | 0.051  | -0.023 | N | 0.058 | -0.014 |
| R11 | HN        | 0.110    | -0.081    | N        | 0.092     | -0.106   | K65       | HN       | 0.053  |        | N | 0.076 |        |
| D12 | HN        |          | 0.043     | N        |           | 0.055    | N66       |          |        |        |   |       |        |
| S13 |           |          |           |          |           |          | L67       | HN       | 0.080  |        | N | 0.107 |        |
| Q14 |           |          |           |          |           |          | Y68       | HN       | 0.119  | -0.075 | N | 0.129 | -0.078 |
| Q15 | HN        | -0.020   |           | N        | -0.086    |          | L69       | HN       | 0.169  | -0.116 | N | 0.197 | -0.114 |
| K16 |           |          |           |          |           |          | S70       | HN       | 0.204  | -0.140 | N | 0.195 | -0.181 |
| S17 |           |          |           |          |           |          | C71       |          |        |        |   |       |        |
| L18 |           |          |           |          |           |          | V72       | HN       | 0.284  | -0.199 | N | 0.232 | -0.223 |
| V19 | HN        | -0.013   | 0.028     | N        | 0.015     | 0.019    | L73       | HN       |        | -0.155 | N |       | -0.219 |
| M20 |           |          |           |          |           |          | K74       | HN       | 0.254  |        | N | 0.223 |        |
| S21 | HN        | 0.001    |           | N        | 0.026     |          | D75       | HN       | 0.122  | -0.047 | N | 0.145 | -0.099 |
| G22 | HN        | -0.009   | 0.045     | N        | 0.022     | 0.044    | D76       | HN       | 0.157  | -0.086 | N | 0.091 | -0.100 |
| P23 |           |          |           |          |           |          | K77       | HN       | 0.270  | -0.175 | N | 0.351 | -0.248 |
| Y24 | HN        | 0.031    | 0.015     | N        | 0.004     | -0.009   | P78       |          |        |        |   |       |        |
| E25 | HN        | 0.043    | 0.008     | N        | 0.097     | 0.017    | T79       | HN       |        | -0.247 | N |       | -0.240 |
| L26 | HN        | 0.083    | -0.034    | N        | 0.092     | 0.001    | L80       | HN       | 0.340  | -0.236 | N | 0.312 | -0.271 |
| K27 | HN        | 0.003    | 0.019     | N        | 0.066     | 0.055    | Q81       | HN       | 0.225  | -0.157 | N | 0.142 | -0.173 |
| A28 | HN        | -0.034   | 0.130     | N        | -0.067    | 0.039    | L82       | HN       | 0.126  | -0.071 | N | 0.141 | -0.132 |
| L29 | HN        | -0.130   |           | N        | -0.192    |          | E83       | HN       | 0.119  | -0.075 | N | 0.108 | -0.070 |
| H30 | HN        | -0.313   | 0.246     | N        | -0.328    | 0.104    | S84       |          |        | -0.045 | N |       | -0.021 |
| L31 | HN        | -0.186   | 0.143     | N        | -0.259    | 0.109    | V85       |          |        |        |   |       |        |
| Q32 | HN        | -0.192   | 0.152     | N        | -0.226    | 0.143    | D86       | HN       | 0.079  | -0.048 | N | 0.121 | -0.021 |
| G33 | HN        | -0.139   | 0.102     | N        | -0.142    | 0.078    | P87       |          |        |        |   |       |        |
| Q34 |           |          |           |          |           |          | K88       | HN       | 0.053  | -0.020 | N | 0.054 | -0.114 |
| D35 | HN        | -0.124   | 0.094     | N        | -0.142    | 0.080    | N89       | HN       | 0.064  |        | N | 0.031 |        |
| M36 | HN        | -0.098   | 0.083     | N        | -0.071    | 0.079    | Y90       | HN       | 0.073  |        | N | 0.133 |        |
| E37 | HN        | -0.085   | 0.063     | N        | -0.040    | 0.019    | P91       |          |        |        |   |       |        |
| Q38 | HN        | -0.074   | 0.052     | N        | -0.089    | 0.064    | K92       |          |        |        |   |       |        |
| Q39 | HN        | -0.038   | 0.040     | N        | -0.013    | 0.055    | K93       | HN       | 0.088  | -0.075 | N | 0.089 | -0.049 |
| V40 | HN        |          | 0.004     | N        |           | -0.053   | K94       | HN       | 0.106  | -0.085 | N | 0.096 | -0.098 |
| V41 | HN        | 0.031    | -0.014    | N        | 0.027     | -0.008   | M95       | HN       | 0.140  | -0.105 | N | 0.127 | -0.082 |
| F42 | HN        | 0.080    | -0.056    | N        | 0.144     | -0.060   | E96       | HN       | 0.144  | -0.106 | N | 0.168 | -0.106 |
| S43 | HN        | 0.113    | -0.074    | N        | 0.162     | -0.058   | K97       | HN       | 0.166  | -0.132 | N | 0.220 | -0.192 |
| M44 | HN        | 0.127    | -0.094    | N        | 0.161     | -0.076   | R98       | HN       |        | -0.152 | N |       | -0.199 |
| S45 | HN        |          | -0.108    | N        |           | -0.149   | F99       | HN       | 0.201  | -0.152 | N | 0.153 | -0.177 |
| F46 | HN        |          | -0.098    | N        |           | -0.125   | V100      | HN       | 0.249  | -0.191 | N | 0.306 | -0.157 |
| V47 | HN        |          | -0.137    | N        |           | -0.160   | F101      | HN       | 0.281  | -0.217 | N | 0.312 | -0.282 |
| Q48 | HN        | 0.149    |           | N        | 0.170     |          | N102      | HN       | 0.426  | -0.343 | N | 0.369 | -0.339 |
| G49 | HN        | 0.175    | -0.139    | N        | 0.188     | -0.161   | K103      | HN       | 0.342  | -0.269 | N | 0.340 | -0.362 |
| E50 | HN        | 0.215    | -0.175    | N        | 0.213     | -0.184   | I104      | HN       | 0.469  | -0.361 | N | 0.414 | -0.368 |
| E51 | HN        | 0.208    | -0.207    | N        | 0.184     | -0.567   | E105      | HN       | 0.417  | -0.316 | N | 0.353 | -0.457 |
| S52 | HN        | 0.238    | -0.203    | N        | 0.287     | -0.190   | I106      | HN       | 0.478  | -0.383 | N | 0.436 | -0.453 |
| N53 |           |          |           |          |           |          | N107      |          |        |        |   |       |        |
| D54 | HN        | 0.290    | -0.242    | N        | 0.326     | -0.222   | N108      | HN       | 0.299  |        | N | 0.287 |        |

**Table S2** (continued). PCSs of backbone  $^1\text{H}$  and  $^{15}\text{N}$  of IL1 $\beta$ -R2.

| <b>R2</b> | PCS [ppm] |          | PCS [ppm] |          | PCS [ppm] |          | PCS [ppm] |          |        |
|-----------|-----------|----------|-----------|----------|-----------|----------|-----------|----------|--------|
|           | Tb (III)  | Tm (III) |        |
| N108 HN   | 0.299     |          | N 0.287   |          | D145      |          |           |          |        |
| K109 HN   | 0.390     | -0.321   | N 0.383   | -0.320   | F146 HN   | 0.471    | -0.335    | N 0.405  | -0.271 |
| L110 HN   |           | -0.349   | N         | -0.321   | T147 HN   | 0.178    | -0.170    | N 0.191  | -0.229 |
| E111      |           |          |           |          | M148 HN   | 0.144    |           | N 0.102  |        |
| F112 HN   | 0.578     |          | N 0.479   |          | Q149 HN   | 0.077    | -0.042    | N 0.066  | -0.017 |
| E113 HN   | 0.550     | -0.421   | N 0.550   | -0.439   | F150 HN   | 0.028    |           | N 0.079  |        |
| S114      |           |          |           |          | V151 HN   | 0.085    | -0.036    | N 0.118  | -0.031 |
| A115 HN   | 0.392     | -0.318   | N 0.397   | -0.311   | S152      |          |           |          |        |
| Q116 HN   | 0.416     |          | N 0.391   |          | S153 HN   |          | -0.050    | N        | -0.089 |
| F117 HN   | 0.478     | -0.381   | N 0.511   | -0.373   |           |          |           |          |        |
| P118      |           |          |           |          |           |          |           |          |        |
| N119 HN   | 0.811     | -0.695   | N 0.875   | -0.773   |           |          |           |          |        |
| W120 HN   | 0.856     |          | N 0.937   |          |           |          |           |          |        |
| Y121 HN   | 0.983     | -0.811   | N 0.804   | -0.729   |           |          |           |          |        |
| I122 HN   | 0.599     | -0.505   | N 0.621   | -0.534   |           |          |           |          |        |
| S123      |           |          |           |          |           |          |           |          |        |
| T124      |           |          |           |          |           |          |           |          |        |
| S125 HN   | 0.010     | -0.025   | N 0.101   | -0.109   |           |          |           |          |        |
| Q126      |           |          |           |          |           |          |           |          |        |
| A127 HN   |           | 0.554    | N         | 0.576    |           |          |           |          |        |
| E128 HN   |           | 0.534    | N         | 0.365    |           |          |           |          |        |
| N129 HN   | -0.313    |          | N -0.341  |          |           |          |           |          |        |
| M130 HN   | -0.245    | 0.208    | N -0.204  | 0.210    |           |          |           |          |        |
| P131      |           |          |           |          |           |          |           |          |        |
| V132 HN   | 0.098     | -0.039   | N 0.102   | -0.085   |           |          |           |          |        |
| F133 HN   | 0.357     | -0.259   | N 0.332   | -0.242   |           |          |           |          |        |
| L134 HN   | 0.537     | -0.415   | N 0.571   | -0.425   |           |          |           |          |        |
| G135 HN   | 0.866     | -0.695   | N 0.888   | -0.767   |           |          |           |          |        |
| G136      |           |          |           |          |           |          |           |          |        |
| T137      |           |          |           |          |           |          |           |          |        |
| K138      |           |          |           |          |           |          |           |          |        |
| <b>G</b>  |           |          |           |          |           |          |           |          |        |
| <b>Y</b>  |           |          |           |          |           |          |           |          |        |
| <b>I</b>  |           |          |           |          |           |          |           |          |        |
| <b>D</b>  |           |          |           |          |           |          |           |          |        |
| <b>T</b>  |           |          |           |          |           |          |           |          |        |
| <b>N</b>  |           |          |           |          |           |          |           |          |        |
| <b>N</b>  |           |          |           |          |           |          |           |          |        |
| <b>D</b>  |           |          |           |          |           |          |           |          |        |
| <b>G</b>  |           |          |           |          |           |          |           |          |        |
| <b>W</b>  |           |          |           |          |           |          |           |          |        |
| <b>I</b>  |           |          |           |          |           |          |           |          |        |
| <b>E</b>  |           |          |           |          |           |          |           |          |        |
| <b>G</b>  |           |          |           |          |           |          |           |          |        |
| <b>D</b>  |           |          |           |          |           |          |           |          |        |
| <b>E</b>  |           |          |           |          |           |          |           |          |        |
| <b>L</b>  |           |          |           |          |           |          |           |          |        |
| <b>Y</b>  |           |          |           |          |           |          |           |          |        |
| G139      |           |          |           |          |           |          |           |          |        |
| G140      |           |          |           |          |           |          |           |          |        |
| Q141      |           |          |           |          |           |          |           |          |        |
| D142      |           |          |           |          |           |          |           |          |        |
| I143      |           |          |           |          |           |          |           |          |        |
| T144      |           |          |           |          |           |          |           |          |        |



## 2D $^1\text{H}$ - $^{15}\text{N}$ -HSQCs of IL1 $\beta$ -LBT

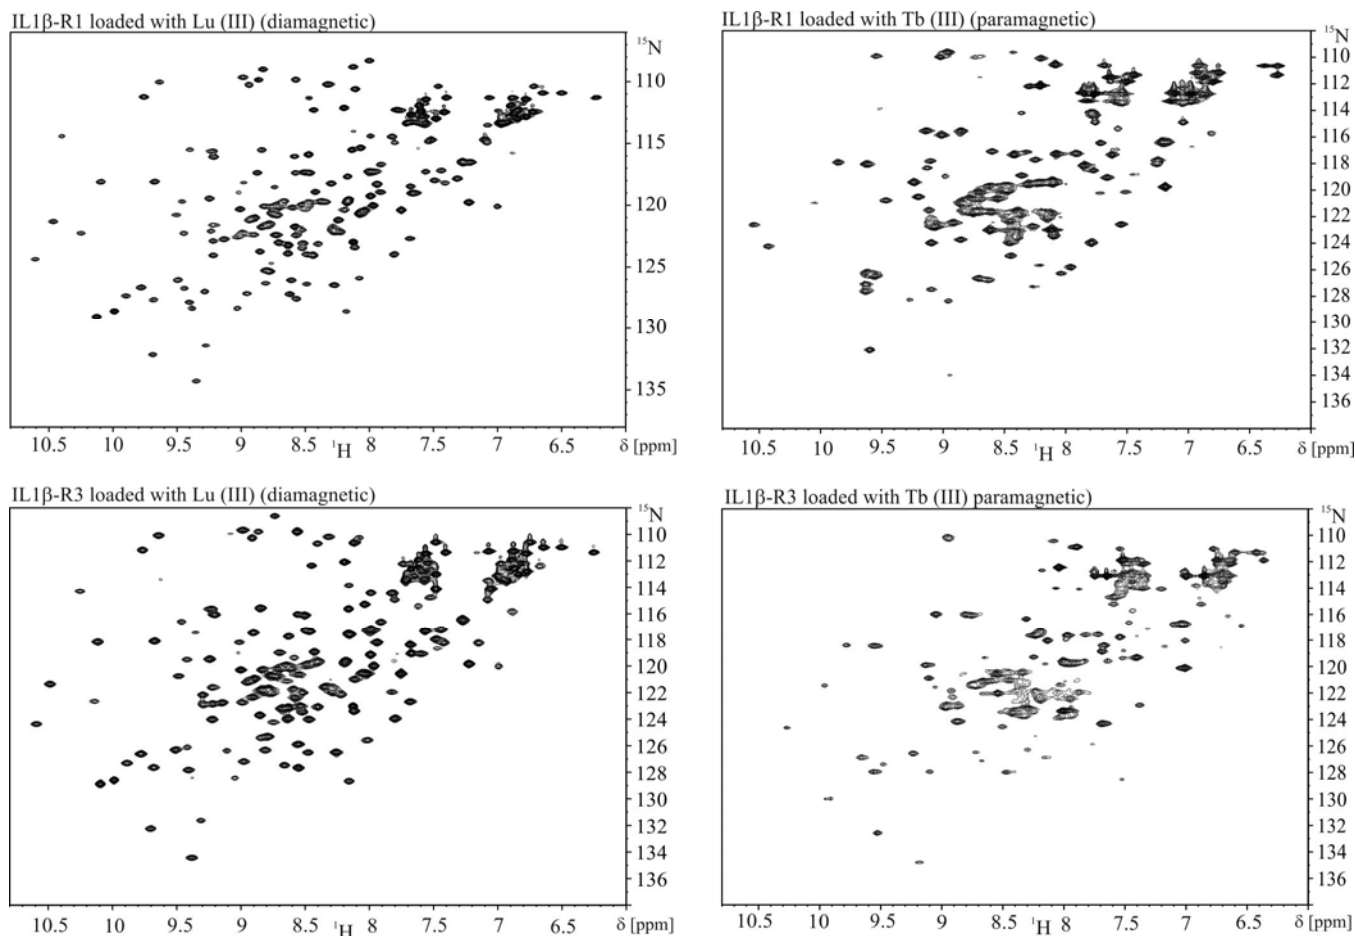

**Figure S7.** 2D- $^1\text{H}$ - $^{15}\text{N}$ -HSQC spectra comparing (left)  $^{15}\text{N}$ -IL1 $\beta$ -R1 and R3 loaded with diamagnetic Lu (III) with (right)  $^{15}\text{N}$ -IL1 $\beta$ -R1 and R3 loaded with paramagnetic Tb (III). Spectra for IL1 $\beta$ -R1 were recorded at pH 7 and 20 °C in 10 mM HEPES, 100 mM NaCl and 10  $\mu\text{M}$  DSS. Spectra for IL1 $\beta$ -R3 were recorded at pH 7 and 20 °C in 10 mM Tris, 100 mM NaCl and 10  $\mu\text{M}$  DSS due to precipitation of IL1 $\beta$ -R3 in HEPES buffer.

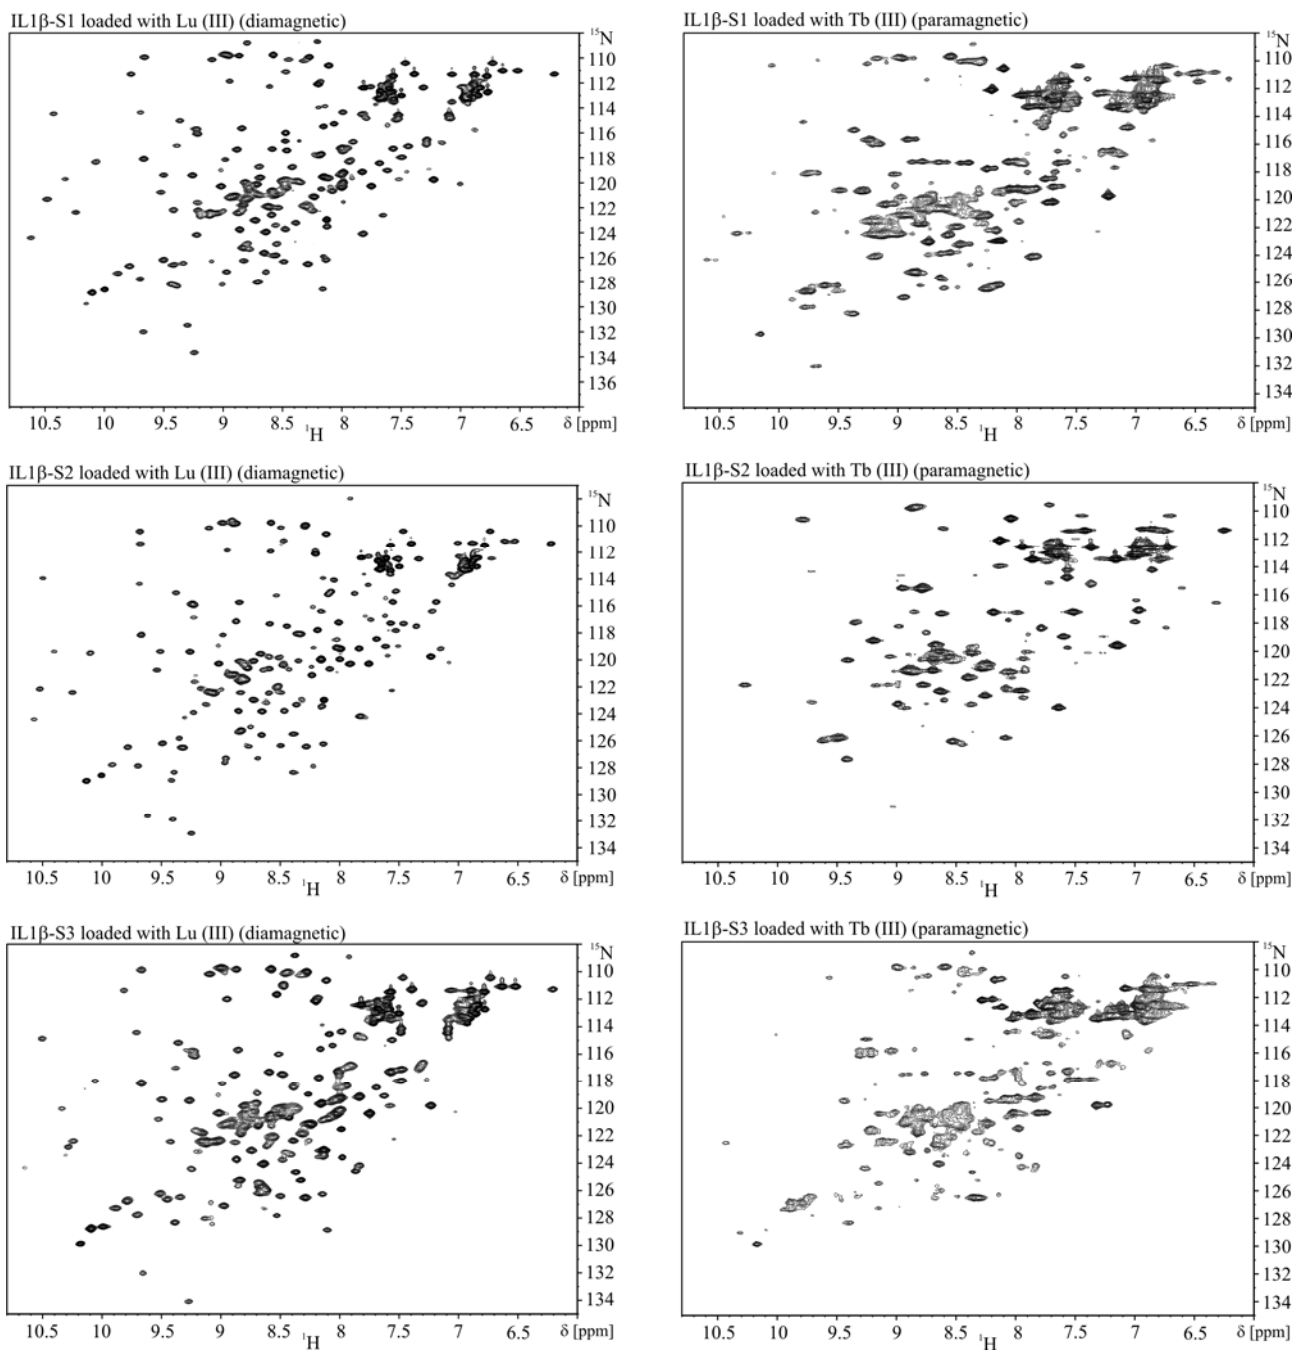

**Figure S8.** 2D- $^1\text{H}$ - $^{15}\text{N}$ - HSQC spectra comparing (left) IL1 $\beta$ -S1, -S2 and -S3 loaded with diamagnetic Lu (III) with (right) IL1 $\beta$ -S1, -S2 and -S3 loaded with paramagnetic Tb (III). Spectra were recorded at pH 7 and 20 °C in 10 mM HEPES, 100 mM NaCl and 10  $\mu\text{M}$  DSS.

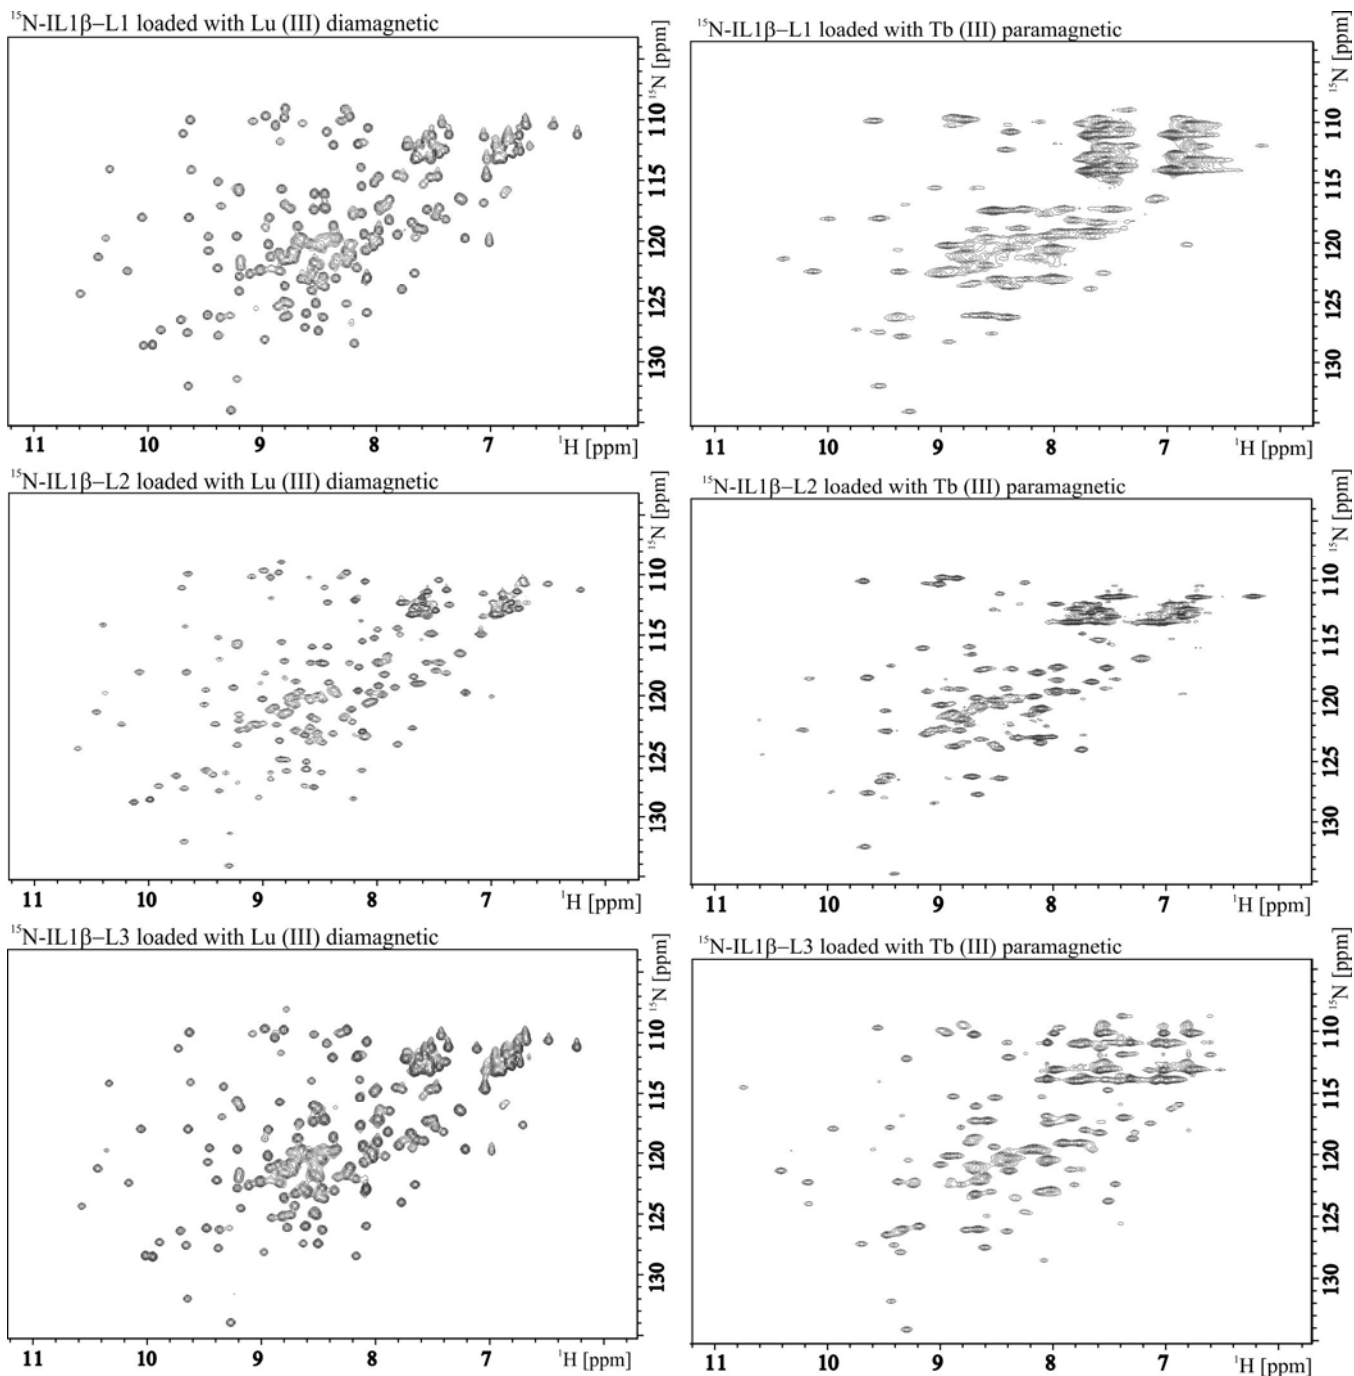

**Figure S9.** 2D- $^1\text{H}$ - $^{15}\text{N}$ - HSQC spectra comparing (left) IL1 $\beta$ -L1, -L2 and -L3 loaded with diamagnetic Lu(III) with (right) IL1 $\beta$ -S1, -S2 and -S3 loaded with paramagnetic Tb(III). Spectra were recorded at pH 7 and 20 °C in 10 mM HEPES, 100 mM NaCl and 10  $\mu\text{M}$  DSS.

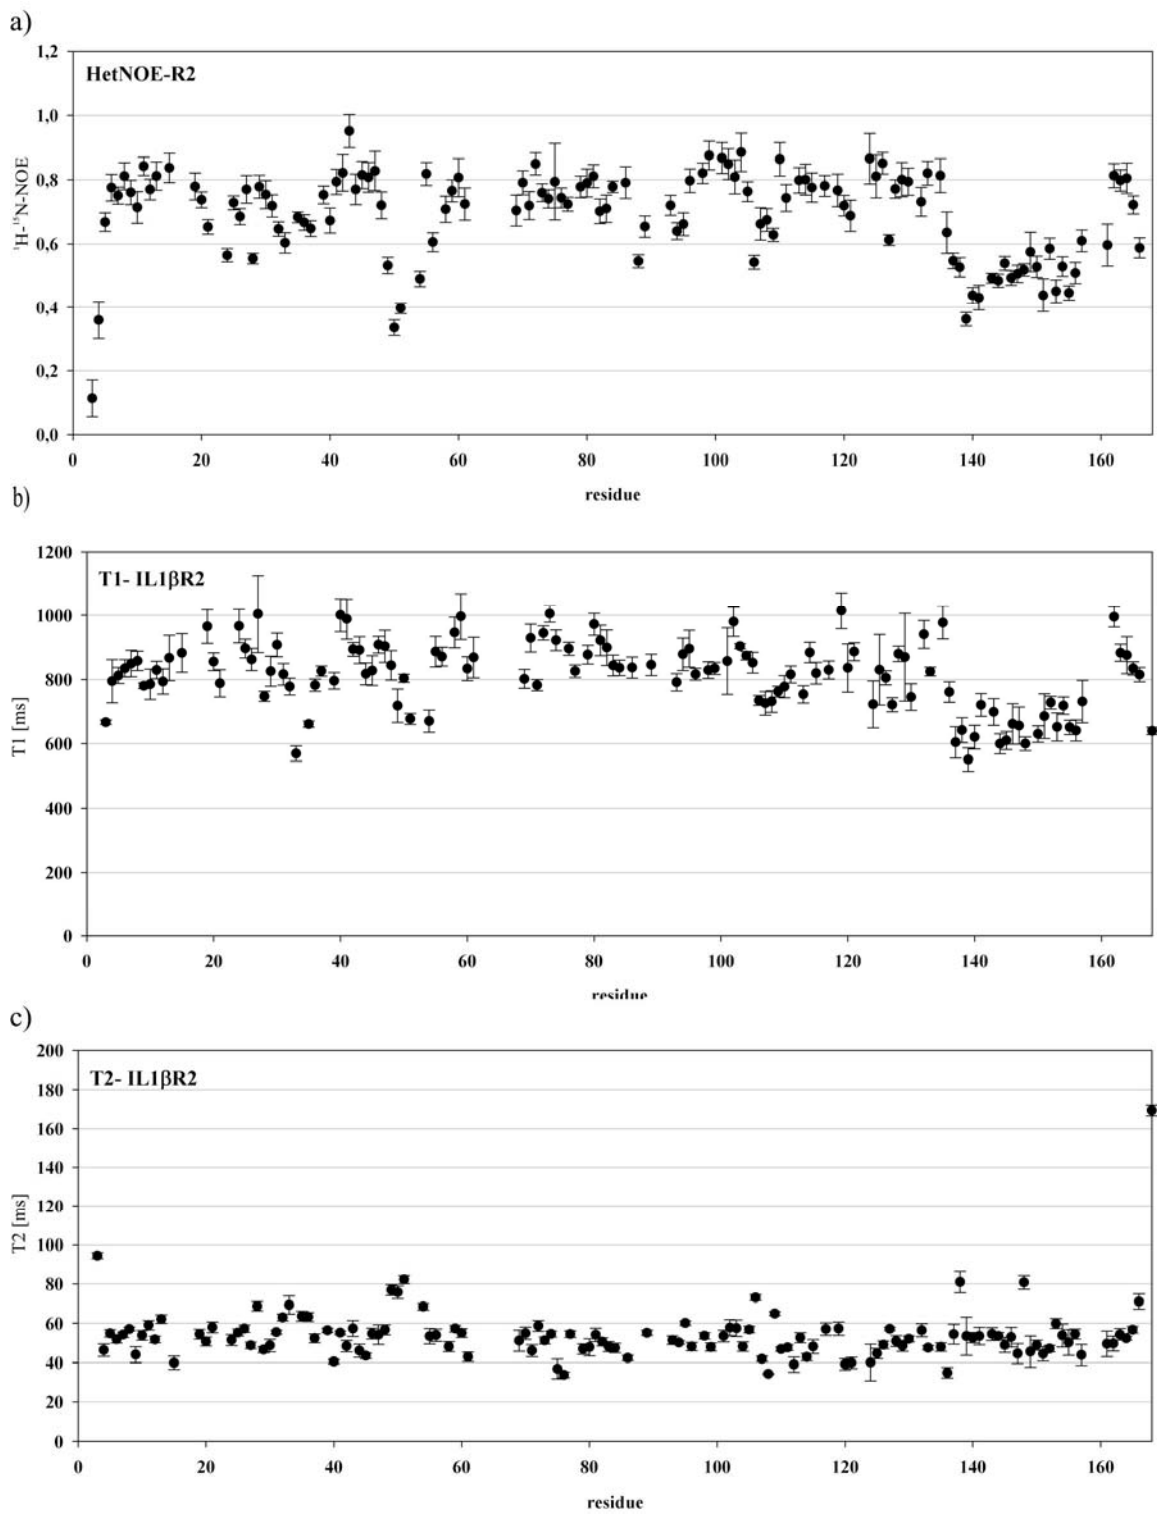

**Figure S10.**  $^{15}\text{N}$ - relaxation data of IL1 $\beta$ -R2. (a)  $\{^1\text{H}\}\text{-}^{15}\text{N}$ - HetNOE, (b) Spin-lattice (longitudinal) relaxation time  $T_1$  and (c) spin-spin (transverse) relaxation time  $T_2$ .

**Table S3.** Relaxation data and order parameters for IL1 $\beta$ -R2

| R2  | HetNOE | DHetNOE | T1   | DF1 | T2   | DF2 | S2   | DS2  | R2   | HetNOE | DHetNOE | T1   | DF1 | T2    | DF2 | S2   | DS2  |  |
|-----|--------|---------|------|-----|------|-----|------|------|------|--------|---------|------|-----|-------|-----|------|------|--|
| A1  |        |         |      |     |      |     |      |      | P87  |        |         |      |     |       |     |      |      |  |
| P2  |        |         |      |     |      |     |      |      | K88  | 0,55   | 0,02    |      |     |       |     |      |      |  |
| V3  | 0,11   | 0,06    | 667  | 7   | 94,3 | 1,5 |      |      | N89  | 0,65   | 0,03    | 845  | 33  | 55,1  | 1,3 | 0,91 | 0,02 |  |
| R4  | 0,36   | 0,06    | 794  | 68  | 46,3 | 3,2 | 0,84 | 0,03 | Y90  |        |         |      |     |       |     |      |      |  |
| S5  | 0,67   | 0,03    | 812  | 25  | 54,8 | 1,9 | 0,89 | 0,01 | P91  |        |         |      |     |       |     |      |      |  |
| L6  | 0,78   | 0,04    | 834  | 27  | 51,9 | 1,9 | 0,97 | 0,01 | K92  |        |         |      |     |       |     |      |      |  |
| N7  | 0,75   | 0,03    | 849  | 41  | 54,2 | 1,3 | 0,95 | 0,01 | K93  | 0,72   | 0,03    | 791  | 27  | 51,4  | 2,1 | 0,91 | 0,01 |  |
| C8  | 0,81   | 0,04    | 858  | 30  | 57,0 | 0,9 | 0,99 | 0,01 | K94  | 0,64   | 0,03    | 878  | 51  | 50,2  | 0,9 | 0,92 | 0,02 |  |
| T9  | 0,76   | 0,04    | 780  | 9   | 44,0 | 4,1 | 0,92 | 0,01 | M95  | 0,66   | 0,04    | 895  | 58  | 60,1  | 1,2 | 0,91 | 0,02 |  |
| L10 | 0,71   | 0,05    | 785  | 47  | 53,8 | 2,5 | 0,92 | 0,02 | E96  | 0,80   | 0,04    | 816  | 18  | 48,1  | 2,1 | 0,96 | 0,01 |  |
| R11 | 0,84   | 0,03    | 829  | 27  | 59,0 | 2,4 | 0,98 | 0,01 | K97  |        |         |      |     |       |     |      |      |  |
| D12 | 0,77   | 0,03    | 793  | 40  | 51,7 | 1,7 | 1,00 | 0,02 | R98  | 0,82   | 0,03    | 829  | 26  | 53,5  | 1,6 | 0,99 | 0,01 |  |
| S13 | 0,81   | 0,04    | 867  | 71  | 62,1 | 2,2 | 0,98 | 0,01 | F99  | 0,88   | 0,04    | 834  | 19  | 47,9  | 2,1 | 0,98 | 0,01 |  |
| Q14 |        |         |      |     |      |     |      |      | V100 |        |         |      |     |       |     |      |      |  |
| Q15 | 0,84   | 0,05    | 882  | 61  | 39,8 | 3,4 | 0,93 | 0,03 | F101 | 0,87   | 0,05    | 857  | 104 | 53,5  | 3,0 | 1,00 | 0,02 |  |
| K16 |        |         |      |     |      |     |      |      | N102 | 0,85   | 0,05    | 980  | 46  | 57,7  | 4,0 | 0,94 | 0,02 |  |
| S17 |        |         |      |     |      |     |      |      | K103 | 0,81   | 0,05    | 903  | 8   | 57,5  | 4,2 | 0,98 | 0,00 |  |
| L18 |        |         |      |     |      |     |      |      | I104 | 0,89   | 0,06    | 874  | 13  | 48,1  | 2,4 | 0,98 | 0,01 |  |
| V19 | 0,78   | 0,04    | 965  | 53  | 54,4 | 2,4 | 0,99 | 0,01 | E105 | 0,76   | 0,03    | 852  | 32  | 56,8  | 1,7 | 0,94 | 0,02 |  |
| M20 | 0,74   | 0,02    | 855  | 28  | 50,7 | 2,3 | 0,95 | 0,01 | I106 | 0,54   | 0,02    | 734  | 15  | 73,0  | 1,4 | 0,83 | 0,01 |  |
| S21 | 0,65   | 0,02    | 788  | 43  | 57,9 | 2,7 | 0,94 | 0,02 | N107 | 0,66   | 0,05    | 726  | 37  | 41,9  | 1,4 | 0,85 | 0,03 |  |
| G22 |        |         |      |     |      |     |      |      | N108 | 0,67   | 0,04    | 731  | 34  | 34,2  | 0,4 | 0,83 | 0,02 |  |
| P23 |        |         |      |     |      |     |      |      | K109 | 0,63   | 0,02    | 762  | 17  | 64,9  | 1,0 | 0,90 | 0,01 |  |
| Y24 | 0,56   | 0,02    | 966  | 52  | 51,4 | 2,8 | 0,83 | 0,02 | L110 | 0,86   | 0,05    | 777  | 34  | 46,8  | 1,1 | 0,96 | 0,02 |  |
| E25 | 0,73   | 0,02    | 896  | 29  | 55,2 | 1,7 | 0,89 | 0,02 | E111 | 0,74   | 0,04    | 815  | 27  | 47,6  | 1,5 | 0,98 | 0,01 |  |
| L26 | 0,69   | 0,02    | 862  | 35  | 57,2 | 1,8 | 0,91 | 0,02 | F112 |        |         |      |     | 39,0  | 3,9 |      |      |  |
| K27 | 0,77   | 0,04    | 1004 | 121 | 48,7 | 1,7 | 0,86 | 0,06 | E113 | 0,80   | 0,04    | 753  | 27  | 52,6  | 2,5 | 0,87 | 0,03 |  |
| A28 | 0,55   | 0,02    | 747  | 16  | 68,6 | 2,4 | 0,78 | 0,01 | S114 | 0,80   | 0,05    | 883  | 32  | 42,8  | 1,8 | 1,00 | 0,01 |  |
| L29 | 0,78   | 0,04    | 825  | 46  | 46,5 | 1,5 | 0,92 | 0,03 | A115 | 0,78   | 0,05    | 819  | 34  | 48,1  | 3,5 | 0,99 | 0,01 |  |
| H30 | 0,75   | 0,04    | 908  | 37  | 48,7 | 3,2 | 0,99 | 0,01 | Q116 |        |         |      |     |       |     |      |      |  |
| L31 | 0,72   | 0,03    | 816  | 34  | 55,4 | 0,9 | 0,94 | 0,02 | F117 | 0,78   | 0,03    | 829  | 28  | 57,0  | 3,1 | 0,98 | 0,01 |  |
| Q32 | 0,65   | 0,02    | 778  | 27  | 62,9 | 1,8 | 0,92 | 0,01 | P118 |        |         |      |     |       |     |      |      |  |
| G33 | 0,60   | 0,03    | 570  | 23  | 69,3 | 4,6 | 0,60 | 0,03 | N119 | 0,77   | 0,05    | 1015 | 57  | 57,3  | 3,4 | 0,93 | 0,02 |  |
| Q34 |        |         |      |     |      |     |      |      | W120 | 0,72   | 0,03    | 836  | 75  | 39,1  | 3,0 | 0,96 | 0,03 |  |
| D35 | 0,68   | 0,02    | 661  | 10  | 63,6 | 2,5 | 0,77 | 0,01 | Y121 | 0,69   | 0,05    | 886  | 28  | 39,8  | 2,9 | 0,94 | 0,01 |  |
| M36 | 0,67   | 0,02    | 782  | 19  | 63,2 | 2,3 | 0,94 | 0,01 | I122 |        |         |      |     |       |     |      |      |  |
| E37 | 0,65   | 0,02    | 826  | 16  | 52,4 | 2,2 | 0,90 | 0,01 | S123 |        |         |      |     |       |     |      |      |  |
| Q38 |        |         |      |     |      |     |      |      | T124 | 0,87   | 0,08    | 722  | 73  | 40,0  | 9,3 | 1,00 | 0,04 |  |
| Q39 | 0,75   | 0,03    | 796  | 26  | 56,4 | 1,1 | 0,95 | 0,01 | S125 | 0,81   | 0,07    | 830  | 110 | 44,6  | 2,6 | 0,99 | 0,05 |  |
| V40 | 0,67   | 0,04    | 1001 | 52  | 40,5 | 1,1 | 0,87 | 0,02 | Q126 | 0,85   | 0,03    | 805  | 22  | 49,0  | 1,9 | 0,97 | 0,01 |  |
| V41 | 0,79   | 0,04    | 989  | 64  | 55,2 | 0,9 | 0,83 | 0,03 | A127 | 0,61   | 0,02    | 721  | 22  | 57,1  | 0,8 | 0,84 | 0,02 |  |
| F42 | 0,82   | 0,06    | 894  | 21  | 48,3 | 2,9 | 0,94 | 0,01 | E128 | 0,77   | 0,03    | 879  | 24  | 50,9  | 2,8 | 0,94 | 0,01 |  |
| S43 | 0,95   | 0,05    | 891  | 42  | 57,3 | 4,1 | 0,98 | 0,02 | N129 | 0,80   | 0,05    | 869  | 137 | 48,4  | 2,7 | 1,00 | 0,02 |  |
| M44 | 0,77   | 0,05    | 817  | 34  | 46,0 | 3,4 | 0,98 | 0,02 | M130 | 0,79   | 0,04    | 745  | 41  | 52,0  | 1,6 | 0,91 | 0,04 |  |
| S45 | 0,82   | 0,04    | 827  | 47  | 43,4 | 1,4 | 0,97 | 0,03 | P131 |        |         |      |     |       |     |      |      |  |
| F46 | 0,81   | 0,05    | 908  | 26  | 54,7 | 2,7 | 0,99 | 0,01 | V132 | 0,73   | 0,05    | 940  | 44  | 56,4  | 3,3 | 0,90 | 0,02 |  |
| V47 | 0,83   | 0,06    | 903  | 50  | 54,2 | 4,9 | 0,99 | 0,02 | F133 | 0,82   | 0,04    | 824  | 14  | 47,5  | 1,1 | 0,98 | 0,01 |  |
| Q48 | 0,72   | 0,04    | 843  | 46  | 56,7 | 2,5 | 0,98 | 0,02 | L134 |        |         |      |     |       |     |      |      |  |
| G49 | 0,53   | 0,03    | 718  | 52  | 76,9 | 2,7 | 0,76 | 0,02 | G135 | 0,81   | 0,05    | 977  | 51  | 47,9  | 2,2 | 0,92 | 0,03 |  |
| E50 | 0,34   | 0,02    | 803  | 13  | 75,7 | 3,2 | 0,82 | 0,01 | G136 | 0,64   | 0,06    | 761  | 32  | 34,8  | 2,7 | 0,84 | 0,02 |  |
| E51 | 0,40   | 0,02    | 677  | 17  | 82,2 | 2,0 | 0,71 | 0,01 | T137 | 0,55   | 0,02    | 605  | 48  | 54,4  | 5,1 | 0,62 | 0,04 |  |
| S52 |        |         |      |     |      |     |      |      | K138 | 0,53   | 0,03    | 642  | 39  | 80,9  | 5,4 | 0,68 | 0,02 |  |
| N53 |        |         |      |     |      |     |      |      | G    | 0,36   | 0,02    | 551  | 36  | 53,4  | 9,7 | 0,43 | 0,05 |  |
| D54 | 0,49   | 0,02    | 670  | 35  | 68,4 | 1,7 | 0,71 | 0,03 | Y    | 0,44   | 0,02    | 621  | 37  | 52,6  | 2,6 | 0,61 | 0,04 |  |
| K55 | 0,82   | 0,04    | 886  | 48  | 53,4 | 3,9 | 0,95 | 0,02 | I    | 0,43   | 0,04    | 720  | 35  | 53,5  | 4,4 | 0,74 | 0,03 |  |
| I56 | 0,61   | 0,03    | 871  | 29  | 53,9 | 3,1 | 0,90 | 0,02 | D    |        |         |      |     |       |     |      |      |  |
| P57 |        |         |      |     |      |     |      |      | T    | 0,49   | 0,02    | 698  | 42  | 54,5  | 3,3 | 0,73 | 0,03 |  |
| V58 | 0,71   | 0,04    | 946  | 48  | 48,1 | 2,5 | 0,94 | 0,02 | N    | 0,48   | 0,02    | 600  | 31  | 53,4  | 1,8 | 0,60 | 0,03 |  |
| A59 | 0,77   | 0,03    | 997  | 72  | 57,2 | 1,6 | 0,97 | 0,01 | N    | 0,54   | 0,02    | 610  | 28  | 48,9  | 3,9 | 0,63 | 0,03 |  |
| L60 | 0,81   | 0,06    | 833  | 37  | 55,0 | 2,1 | 1,00 | 0,01 | D    | 0,49   | 0,02    | 661  | 63  | 52,9  | 5,0 | 0,68 | 0,05 |  |
| G61 | 0,72   | 0,05    | 868  | 63  | 42,9 | 2,3 | 1,00 | 0,03 | G    | 0,51   | 0,03    | 656  | 58  | 44,5  | 5,1 | 0,67 | 0,05 |  |
| L62 |        |         |      |     |      |     |      |      | W    | 0,52   | 0,02    | 600  | 21  | 80,7  | 3,5 | 0,65 | 0,02 |  |
| K63 |        |         |      |     |      |     |      |      | I    | 0,58   | 0,06    |      |     | 45,5  | 8,0 |      |      |  |
| E64 |        |         |      |     |      |     |      |      | E    | 0,53   | 0,03    | 630  | 26  | 48,9  | 2,6 | 0,67 | 0,02 |  |
| K65 |        |         |      |     |      |     |      |      | G    | 0,44   | 0,05    | 685  | 70  | 44,4  | 3,7 | 0,69 | 0,06 |  |
| N66 |        |         |      |     |      |     |      |      | D    | 0,58   | 0,03    | 728  | 20  | 47,1  | 1,6 | 0,78 | 0,01 |  |
| L67 |        |         |      |     |      |     |      |      | E    | 0,45   | 0,04    | 652  | 44  | 59,8  | 2,5 | 0,66 | 0,04 |  |
| Y68 |        |         |      |     |      |     |      |      | L    | 0,53   | 0,03    | 718  | 27  | 53,8  | 5,9 | 0,78 | 0,02 |  |
| L69 | 0,70   | 0,05    | 801  | 29  | 51,1 | 5,4 | 0,91 | 0,02 | Y    | 0,45   | 0,02    | 651  | 22  | 50,2  | 6,5 | 0,63 | 0,02 |  |
| S70 | 0,79   | 0,04    | 929  | 43  | 54,8 | 3,1 | 0,89 | 0,02 | G139 |        |         |      |     |       |     |      |      |  |
| C71 | 0,72   | 0,04    | 782  | 18  | 46,0 | 3,0 | 0,90 | 0,01 | G140 |        |         |      |     |       |     |      |      |  |
| V72 | 0,85   | 0,03    | 945  | 22  | 58,6 | 2,8 | 0,86 | 0,01 | Q141 | 0,51   | 0,03    | 641  | 33  | 54,5  | 2,5 | 0,67 | 0,03 |  |
| L73 | 0,76   | 0,03    | 1005 | 26  | 51,2 | 1,7 | 0,83 | 0,01 | D142 | 0,61   | 0,03    | 731  | 66  | 43,9  | 5,3 | 0,84 | 0,04 |  |
| K74 | 0,74   | 0,03    | 922  | 32  | 54,5 | 1,5 | 0,89 | 0,02 | I143 |        |         |      |     |       |     |      |      |  |
| D75 | 0,79   | 0,12    |      |     | 36,8 | 5,1 |      |      | T144 |        |         |      |     |       |     |      |      |  |
| D76 | 0,74   | 0,03    | 896  | 21  | 33,7 | 1,5 | 0,94 | 0,01 | D145 |        |         |      |     |       |     |      |      |  |
| K77 | 0,72   | 0,02    | 826  | 20  | 54,4 | 1,7 | 0,94 | 0,01 | F146 | 0,60   | 0,07    |      |     | 49,5  | 6,5 |      |      |  |
| P78 |        |         |      |     |      |     |      |      | T147 | 0,81   | 0,04    | 995  | 32  | 49,6  | 3,8 | 0,82 | 0,02 |  |
| T79 | 0,78   | 0,03    | 877  | 29  | 46,9 | 2,6 | 0,95 | 0,02 | M148 | 0,80   | 0,03    | 883  | 27  | 54,2  | 3,0 | 0,94 | 0,02 |  |
| L80 | 0,79   | 0,04    | 972  | 35  | 47,8 | 4,4 | 0,89 | 0,02 | Q149 | 0,80   | 0,05    | 875  | 58  | 52,3  | 0,9 | 0,97 | 0,03 |  |
| Q81 | 0,81   | 0,04    | 921  | 48  | 54,1 | 3,4 | 0,92 | 0,02 | F150 | 0,72   | 0,03    | 834  | 21  | 56,7  | 1,7 | 0,96 | 0,01 |  |
| L82 | 0,70   | 0,04    | 899  | 55  | 50,6 | 2,0 | 0,93 | 0,02 | V151 | 0,59   | 0,03    | 815  | 22  | 71,0  | 3,9 | 0,90 | 0,01 |  |
| E83 | 0,71   | 0,04    | 843  | 32  | 48,2 | 2,5 | 0,96 | 0,01 | S152 |        |         |      |     |       |     |      |      |  |
| S84 | 0,78   | 0,02    | 836  | 24  | 47,4 | 2,4 | 0,95 | 0,01 | S153 | -0,12  | -0,01   | 640  | 12  | 169,4 | 2,8 |      |      |  |
| V85 |        |         |      |     |      |     |      |      |      |        |         |      |     |       |     |      |      |  |
| D86 | 0,79   | 0,05    | 837  | 32  | 42,3 | 1,4 | 0,93 | 0,02 |      |        |         |      |     |       |     |      |      |  |

### **Crystallization and Structure determination of IL1 $\beta$ -L3**

For crystallization protein was loaded with TbCl<sub>3</sub> as described for IL1 $\beta$ -S1 and concentrated to 15 mg/ml. Initial screening used the Hampton Index screen. IL1 $\beta$ -L3 crystallized readily from 0.2 M ammonium sulfate, 0.1 M Bis-Tris pH 6.5, 25% w/v PEG 3,350 (condition 67, Hampton Index Screen).

Data were collected at beamline X12C at the National Synchrotron Light Source. IL1 $\beta$ -L3 crystals were cryoprotected by soaking the crystals in 15% glucose in mother liquid and then transferred to 30% glucose solution plus mother liquor. Crystals were flash frozen in the gaseous cryogenic N<sub>2</sub> stream. Data were collected at beamline X12C at the National Synchrotron Light Source using a wavelength of 0.95 Å and processed with DENZO/SCALEPACK<sup>3</sup>. Crystals diffracted to 1.7 Å and belong to space group P4(1). Data collection and refinement statistics are presented in Table S4.

The structure solution was carried out via molecular replacement with the program Phenix<sup>4</sup> using the structure of wild-type IL1 $\beta$  as the model (PDB 1T4Q) with residues 74-77 and all solvent molecules removed. Manual protein rebuilding was performed in COOT<sup>5</sup> with alternating rounds of refinement carried out in Phenix. The final model contains the entire IL1 $\beta$  molecule (excluding residues 80-86) including 7 of 17 residues of the LBT and 123 waters.

**Table S4** Data collection, Structure Determination and Refinement Statistics of IL1 $\beta$ -L3

---

| Data Collection – IL1 $\beta$ -L3 Mutant                      |                                                              |
|---------------------------------------------------------------|--------------------------------------------------------------|
| Space group and unit cell                                     | $P4_1$ ; $a = b = 42.6 \text{ \AA}$ , $c = 88.0 \text{ \AA}$ |
| Wavelength ( $\text{\AA}$ )                                   | 1.54                                                         |
| Resolution limits ( $\text{\AA}$ ) (highest resolution shell) | 19.17-1.70 (1.76-1.70)                                       |
| no. of reflections                                            |                                                              |
| Measured                                                      | 298,082                                                      |
| Unique                                                        | 33,108                                                       |
| Completeness (%)                                              |                                                              |
| All data (highest resolution shell)                           | 97.4 (91.0)                                                  |
| $R_{\text{sym}}^a$ (on $I$ ) (highest resolution shell)       | 0.039 (0.48)                                                 |
| $[I/\sigma(I)]$                                               |                                                              |
| all data (highest resolution shell)                           | 33.8 (4.77)                                                  |

---

| Refinement                                      |           |
|-------------------------------------------------|-----------|
| Resolution ( $\text{\AA}$ )                     | 19.2-1.70 |
| R factor                                        | 0.174     |
| R free                                          | 0.213     |
| Reflections in test set                         | 3,355     |
| non-hydrogen atoms                              | 1,429     |
| RMS deviations                                  |           |
| Bond lengths ( $\text{\AA}$ )                   | 0.007     |
| Angles ( $^\circ$ )                             | 1.13      |
| Average B factor ( $\text{\AA}^2$ ) (all atoms) | 39.1      |

---

$$R_{\text{sym}} = \frac{\sum |I_{\text{obs}} - \langle I \rangle|}{\sum I_{\text{obs}}}$$

## References

- (1) Studier, F. W. *Protein Expr. Purif.* 2005, 41, 207.
- (2) Zweckstetter, M. *Nat. Protoc.* 2008, 3, 679.
- (3) Otwinowski, Z.; Minor, W.; Carter, C. W. *J. Methods Enzymol.* 1997, 276, 307.
- (4) Adams, P. D.; et al. *Acta Crystallograph., Sect. D* 2009, 66, 213.
- (5) Emsley, P.; Cowtan, K. *Acta Crystallogr., Sect. D: Biol. Crystallogr.* 2004, 60, 2126.

### Complete References:

- (63) Schwede, T.; Sali, A.; Honig, B.; Levitt, M.; Berman, H. M.; Jones, D.; Brenner, S. E.; Burley, S. K.; Das, R.; Dokholyan, N. V.; Dunbrack, R. L.; Fidelis, K.; Fiser, A.; Godzik, A.; Huang, Y. J.; Humblet, C.; Jacobson, M. P.; Joachimiak, A.; Krystek, S. R. J.; Kortemme, T.; Kryshtafovych, A.; Montelione, G. T.; Moulton, J.; Murray, D.; Sanchez, R.; Sosnick, T. R.; Standley, D. M.; Stouch, T.; Vajda, S.; Vasquez, M.; Westbrook, J. D.; Wilson, I. A. *Structure* 2009, 17, 151
- (92) Adams, P. D.; Afonine, P. V.; Bunkóczi, G.; Chen, V. B.; Davis, I. W.; Echols, N.; Headd, J. J.; Hung, L.-W.; Gross-Kunstleve, R. W.; McCoy, A. J.; Moras, N. W.; Oeffner, R.; Read, R. J.; Richardson, D. C.; Richardson, J. S.; Terwilliger, T. C.; Zwart, P. H. *Acta Crystallograph., Sect. D* 2009, 66, 213.
